# Supplementary material
Source: PubMed Central journal article supplement (PMC9580346)
Supplement: jcm.01057-22-s0001.pdf [file jcm.01057-22-s0001.pdf]

| <b>Supplemental Table 1. Positivity rates for <i>H. capsulatum</i> complement fixation and immunodiffusion assays in different patient cohorts</b> |                            |                       |                        |                       |
|----------------------------------------------------------------------------------------------------------------------------------------------------|----------------------------|-----------------------|------------------------|-----------------------|
|                                                                                                                                                    | <b>Complement Fixation</b> |                       | <b>Immunodiffusion</b> |                       |
|                                                                                                                                                    | <b>Positive (%)</b>        | <b><i>P</i> value</b> | <b>Positive (%)</b>    | <b><i>P</i> value</b> |
| <b>Immunocompromised</b>                                                                                                                           |                            |                       |                        |                       |
| No (n=16)                                                                                                                                          | 9 (56)                     | 0.370                 | 10 (62.5)              | 0.986                 |
| Yes (n=51)                                                                                                                                         | 35 (68.6)                  |                       | 32 (62.7)              |                       |
| <b>Duration of Symptoms (months)<sup>a</sup></b>                                                                                                   |                            |                       |                        |                       |
| <1 (n=29)                                                                                                                                          | 19 (65.5)                  | 0.428                 | 18 (62.1)              | 0.790                 |
| 1-3 (n=14)                                                                                                                                         | 8 (57.1)                   |                       | 8 (57.1)               |                       |
| >3 (n=22)                                                                                                                                          | 17 (77.3)                  |                       | 15 (68.2)              |                       |
| <b>Extent of Disease</b>                                                                                                                           |                            |                       |                        |                       |
| Localized (n=34)                                                                                                                                   | 20 (58.8)                  | 0.231                 | 19 (55.9)              | 0.242                 |
| Disseminated (n=33)                                                                                                                                | 24 (72.7)                  |                       | 23 (69.7)              |                       |

<sup>a</sup> Two patients with asymptomatic infection were excluded from this analysis

**Supplemental Table 2. Comparison of *H. capsulatum* complement fixation titers for yeast and mycelial antigens relative to immunodiffusion precipitation bands**

|                      | <b>Complement Fixation Titers</b> |     |             |     |             |     |             |     |              |     |              |     |              |     |               |     |
|----------------------|-----------------------------------|-----|-------------|-----|-------------|-----|-------------|-----|--------------|-----|--------------|-----|--------------|-----|---------------|-----|
|                      | <b>1:8</b>                        |     | <b>1:16</b> |     | <b>1:32</b> |     | <b>1:64</b> |     | <b>1:128</b> |     | <b>1:256</b> |     | <b>1:512</b> |     | <b>1:1024</b> |     |
|                      | Yst                               | Myc | Yst         | Myc | Yst         | Myc | Yst         | Myc | Yst          | Myc | Yst          | Myc | Yst          | Myc | Yst           | Myc |
| <b>M-Band</b>        | 4                                 | 3   | 3           | 4   | 4           | 5   | 3           | 1   | 3            | 2   | 6            | 2   | 0            | 1   | 0             | 0   |
| <b>H and M Bands</b> | 0                                 | 1   | 1           | 0   | 0           | 0   | 1           | 0   | 5            | 3   | 1            | 2   | 1            | 2   | 3             | 4   |

Abbreviations: Yst, yeast antigen; Myc, mycelial antigen; CF, complement fixation

<sup>a</sup> Comparison of median CF Yst titers between M-band only and H- and M-band samples, *P* value: 0.0053

<sup>b</sup> Comparison of median CF Myc titers between M-band only and H- and M-band samples, *P* value: 0.0015
